# Do latitude and ozone concentration predict Covid-2019 cases in 34 countries?

Mark M. Alipio

April 9, 2020

## Correspondence:

Mark M. Alipio  
Department of Radiologic Technology  
College of Allied Health Sciences  
Davao Doctors College  
Gen. Malvar St., Davao City 8000  
Davao del Sur, Philippines  
Office +63 (082) 222 0850  
[markalipiorrt@gmail.com](mailto:markalipiorrt@gmail.com)

# Do latitude and ozone concentration predict Covid-2019 cases in 34 countries?

## Abstract

In this paper, I used multivariate linear regression analysis to determine if latitude and ozone concentration predict Covid-2019 cases in 34 countries worldwide. Data pertaining to Covid-2019 cases were extracted from Worldometer. Ozone concentration levels were taken from the open-access database of World Ozone and Ultraviolet Radiation Data Centre (WOUDC). Latitude of specific area where measurement took place was also provided in the database. Preliminary Kendall rank correlation test revealed that Covid-2019 incidence was positively and significantly related to ozone concentration; however, incidence was not significantly related to latitude. Using multivariate linear regression, a statistically significant link between ozone concentration and Covid-2019 incidence in 34 countries was established; however, I found no statistical association between latitude and Covid-2019 incidence refuting previous claims. Prompt health actions should be developed for areas with high ozone concentration in the present and possibly, future outbreaks; however, extensive laboratory analysis should be conducted to further confirm the findings of the study. Nevertheless, the results of this study could serve as a basis for further clinical and large-scale studies.

**Keywords:** Covid-2019, SARS-CoV-2, novel coronavirus, coronavirus, latitude, ozone concentration, Vitamin D

## Background

It has come to my attention that Covid-2019 trajectory could be explained by temperature, humidity, and latitude.<sup>1,2,3</sup> However, prediction needs more sound empirical evidence to provide accurate planning strategies for the present and possibly, future outbreaks. Previous works also provided argument pertaining to the possible relationship between latitude dependence of Covid-2019 mortality and Vitamin D deficiency.<sup>4,5</sup>

Vitamin D is strongly affected by ozone variability, since ozone filters Ultraviolet B, an important factor for Vitamin D synthesis.<sup>6</sup> A possible link between ozone concentration and Covid-2019 incidence, therefore, should be established. In this paper, I used multivariate linear regression analysis to determine if latitude and ozone concentration predict Covid-2019 cases in 34 countries worldwide.

## Methods

Data pertaining to Covid-2019 cases were extracted from Worldometer.<sup>7</sup> Ozone concentration levels were taken from the open-access database of World Ozone and Ultraviolet Radiation Data Centre (WOUDC).<sup>8</sup> Ozone concentration was expressed as Dobson unit (DU), the number of molecules of ozone required to generate a 0.01-mm layer of pure ozone at a temperature of 0 °C and a pressure of 1 atm. Unfortunately, data pertaining to ozone concentration were only available in 34 countries. Measurement was recorded by WOUDC on April 2019 and monthly ozone concentration was considered for the analysis. Latitude of specific area where measurement took place was also provided in the database. The complete data of 34 countries were provided in Table 4.

Descriptive statistics (mean, frequency, percentage) were used for the categorical and continuous variables. I used Kendall rank correlation test to determine if latitude and ozone concentration are significantly associated with Covid-2019 cases. Multivariate linear regression was used for the prediction of cases based on latitude and ozone concentration predictors. A p-value below 0.05 was considered significant.

## Results and Discussion

Mean latitude of countries used in the analysis was 30.9 degrees, mean ozone concentration was 334.2 Dobson units, and mean Covid-2019 case was 277.4 cases (Table 1). Kendall rank correlation test revealed that Covid-2019 cases were positively and significantly related to ozone concentration ( $p < 0.001$ ); however, cases were not significantly related to latitude (Table 2). This is indicative that the number of Covid-2019 cases in 34 countries increases with ozone concentration level, while latitude has nothing to do with the burgeoning cases.

Multivariate linear regression revealed that only ozone concentration significantly predicts Covid-2019 cases ( $\beta = 0.721$ ,  $p < 0.001$ ). For every one Dobson unit increase in the ozone concentration, the number of Covid-2019 cases also increases by approximately more than 706 cases ( $B = 706.962$ ). This shows how an incremental change in ozone concentration could drastically influence the number of Covid-2019 cases across 34 countries studied.

Table 1. Descriptive statistics

| Variables                        | Frequency, N | Percentage, % | Mean  |
|----------------------------------|--------------|---------------|-------|
| Overall                          | 34           | 100.0         |       |
| Latitude, degrees                |              |               | 30.9  |
| -60 to -10.001                   | 5            | 14.7          |       |
| -10 to 39.999                    | 11           | 32.4          |       |
| 40 to 89.999                     | 18           | 52.9          |       |
| Ozone concentration, Dobson unit |              |               | 334.2 |
| 240 - 309.9                      | 11           | 32.4          |       |
| 310 - 379.9                      | 18           | 52.9          |       |
| 380 - 449.9                      | 5            | 14.7          |       |
| Covid-2019 cases, N              |              |               | 277.4 |
| 0 - 399                          | 41           | 65.1          |       |
| 400 - 799                        | 16           | 25.4          |       |
| 800 - 1199                       | 6            | 9.5           |       |

Table 2. Kendall rank correlation analysis

| Variables              | 1 | 2      | 3       |
|------------------------|---|--------|---------|
| 1. Latitude            | - | 0.44** | 0.08    |
| 2. Ozone concentration |   | -      | 0.85*** |
| 3. Covid-2019 cases    |   |        | -       |

Note: \*p<0.05. \*\*\*p<0.001

Table 3. Regression analysis summary for latitude and ozone concentration predicting Covid-2019 cases

| Variables           | B         | $\beta$ | t     | p-value |
|---------------------|-----------|---------|-------|---------|
| (Constant)          | 17549.230 |         | 4.170 | <0.001  |
| Latitude            | 10.234    | 0.120   | 1.127 | 0.268   |
| Ozone concentration | 706.962   | 0.721   | 4.712 | <0.001  |

Ozone concentration is inversely related to Ultraviolet transmission.<sup>6</sup> While other factors may play an important role in Vitamin D synthesis in the human body, it has been recommended that the most promising means of mitigating the burden of Vitamin D deficiency seems to be by increased Ultraviolet exposure (at optimal level).<sup>6</sup> This highly suggests that high ozone concentration could reduce transmission of Ultraviolet rays, which could have aided synthesis of Vitamin D. Although no clinical trials have been made in the 34 countries included in the study, Vitamin D levels in individuals residing in areas where ozone concentration was high could possibly be deficient or at least insufficient. Studies established how Vitamin D supplementation could increase immunity against infection, especially the common cold.<sup>9,10</sup>

While there is a dearth of research confirming the effect of Vitamin D supplementation on Covid-2019 outcome among actual patients, a previous work found Vitamin D supplementation could possibly improve clinical outcomes of Covid-2019 patients based on increasing odds ratio of having a mild outcome when serum 25-hydroxyvitamin D [25(OH)D] level increases.<sup>5</sup> Serum 25(OH)D is a robust indicator of Vitamin D status. Hence, health action plans could be developed to provide adequate intake of Vitamin D to individuals living in areas where ozone concentration is high. However, the negative spillover effects of low ozone concentration should not be downplayed as this is an important indicator of ozone layer depletion in the stratosphere.

This study noted several limitations. The sample size is small; hence, generalizability of the results is limited to the countries included in the analysis. Also, actual patients' information were not used to support the claim on the relationship between Vitamin D supplementation and Covid-2019 clinical outcome. Therefore, clinical trials and large sample studies should be conducted to further verify the causal link among these variables.

## **Conclusion**

In conclusion, a statistically significant link between ozone concentration and Covid-2019 cases in 34 countries was established in the study; however, I found no statistical association between latitude and Covid-2019 incidence refuting previous claims. Prompt health actions should be developed for areas with high ozone concentration in the present and possibly, future outbreaks; however, extensive laboratory analysis should be conducted to confirm the link between Vitamin D supplementation and Covid-2019 clinical outcome. Nevertheless, the results of this study could serve as a basis for further clinical and large-scale studies.

## **Declaration of Competing Interests**

The author declares no conflict of interest.

## **Funding**

None. No funding to declare.

## Supplementary Data

Table 4. Ozone concentration levels of 34 countries included in the analysis

| Countries   | Ozone Concentration, Dobson unit (April 2019) |
|-------------|-----------------------------------------------|
| Algeria     | 265.6                                         |
| Argentina   | 274.2                                         |
| Australia   | 269.2                                         |
| Belgium     | 384.9                                         |
| Brazil      | 260                                           |
| Chile       | 268.5                                         |
| China       | 357.3                                         |
| Egypt       | 312                                           |
| Finland     | 362.2                                         |
| France      | 291.6                                         |
| Germany     | 359.1                                         |
| Greece      | 375.7                                         |
| Greenland   | 415.9                                         |
| India       | 285.9                                         |
| Ireland     | 383.4                                         |
| Italy       | 373.4                                         |
| Japan       | 350.3                                         |
| Lithuania   | 367.2                                         |
| Luxembourg  | 354.3                                         |
| Moldova     | 362.3                                         |
| Netherlands | 386.2                                         |
| Norway      | 364.3                                         |
| Philippines | 242.8                                         |
| Poland      | 355.4                                         |
| Romania     | 367.6                                         |
| Slovakia    | 348.4                                         |
| Spain       | 364.8                                         |
| Sweden      | 353.3                                         |
| Taiwan      | 289.9                                         |
| Thailand    | 263.5                                         |
| UK          | 387.1                                         |
| Ukraine     | 363.4                                         |
| USA         | 320.3                                         |
| Vietnam     | 283.2                                         |



## References

- <sup>1</sup> Otter, J. A., Donskey, C., Yezli, S., Douthwaite, S., Goldenberg, S. D., & Weber, D. J. (2016). Transmission of SARS and MERS coronaviruses and influenza virus in healthcare settings: the possible role of dry surface contamination. *Journal of Hospital Infection*, 92(3), 235-250.
- <sup>2</sup> Chan, K. H., Peiris, J. S., Lam, S. Y., Poon, L. L. M., Yuen, K. Y., & Seto, W. H. (2011). The effects of temperature and relative humidity on the viability of the SARS coronavirus. *Advances in virology*, 2011.
- <sup>3</sup> Sajadi, M. M., Habibzadeh, P., Vintzileos, A., Shokouhi, S., Miralles-Wilhelm, F., & Amoroso, A. (2020). Temperature and latitude analysis to predict potential spread and seasonality for COVID-19. Available at SSRN 3550308.
- <sup>4</sup> Braiman, Mark, Latitude Dependence of the COVID-19 Mortality Rate—A Possible Relationship to Vitamin D Deficiency? (March 26, 2020). Available at SSRN: <https://ssrn.com/abstract=3561958> or <http://dx.doi.org/10.2139/ssrn.3561958>
- <sup>5</sup> Alipio, Mark, Vitamin D Supplementation Could Possibly Improve Clinical Outcomes of Patients Infected with Coronavirus-2019 (COVID-2019) (April 8, 2020). Available at SSRN: <https://ssrn.com/abstract=3571484>
- <sup>6</sup> Olds, W. J., Moore, M. R., & Kimlin, M. G. (2006, December). Vitamin D Synthesis by UV Radiation: the Importance of Ozone Monitoring. In *AGU Fall Meeting Abstracts*.
- <sup>7</sup> COVID-19 Coronavirus Pandemic. Retrieved from <https://www.worldometers.info/coronavirus/> (April 9, 2020).
- <sup>8</sup> Data Search / Download. Retrieved from <https://woudc.org/data/explore.php?lang=en> (April 9, 2020).
- <sup>9</sup> Rondanelli, M., Miccono, A., Lamburghini, S., Avanzato, I., Riva, A., Allegrini, P., ... & Perna, S. (2018). Self-care for common colds: the pivotal role of vitamin D, vitamin C, zinc, and Echinacea in three main immune interactive clusters (physical barriers, innate and adaptive immunity) involved during an episode of common colds—Practical advice on dosages and on the time to take these nutrients/botanicals in order to prevent or treat common colds. *Evidence-Based Complementary and Alternative Medicine*, 2018.
- <sup>10</sup> Grant, W. B., Lahore, H., McDonnell, S. L., Baggerly, C. A., French, C. B., Aliano, J. L., & Bhattoa, H. P. (2020). Evidence that Vitamin D Supplementation Could Reduce Risk of Influenza and COVID-19 Infections and Deaths. *Nutrients*, 12(4), 988.
